# Supplementary material
Source: PubMed Central journal article supplement (PMC5339856)
Supplement: cs6b03344_si_001.pdf [file cs6b03344_si_001.pdf]

# Supporting Information

## **When Weaker Can Be Tougher: On the Role of Oxidation State (I) in P- vs. N-Ligand Derived Ni-Catalyzed Trifluoromethylthiolation of Aryl halides**

**Indrek Kalvet,<sup>†</sup> Qianqian Guo,<sup>‡</sup> Graham J. Tizzard,<sup>§</sup> and Franziska Schoenebeck<sup>\*†</sup>**

<sup>†</sup>Institute of Organic Chemistry, RWTH Aachen University, Landoltweg 1, 52074 Aachen, Germany

<sup>‡</sup>Institute of Inorganic Chemistry, X-Ray Crystallography, RWTH Aachen University, Landoltweg 1, 52074 Aachen, Germany

<sup>§</sup>EPSRC National Crystallography Service, School of Chemistry, University of Southampton, University Road SO17 1BJ Southampton, United Kingdom

\* E-mail: [franziska.schoenebeck@rwth-aachen.de](mailto:franziska.schoenebeck@rwth-aachen.de)

# Contents

|      |                                                                           |    |
|------|---------------------------------------------------------------------------|----|
| 1.   | General Information .....                                                 | 3  |
| 1.1. | Trifluoromethylthiolation with dppf / Ni(cod) <sub>2</sub> catalyst ..... | 3  |
| 1.2. | Studies into SCF <sub>2</sub> formation .....                             | 4  |
| 2.   | Synthetic procedures .....                                                | 6  |
| 2.1. | Preparation of Ni <sup>(I)</sup> I- and Br-complexes .....                | 6  |
| 3.   | Crystallographic data .....                                               | 8  |
| 4.   | Computational details .....                                               | 10 |
| 5.   | NMR spectra .....                                                         | 24 |
| 6.   | References .....                                                          | 27 |

## 1. General Information

$^1\text{H}$ ,  $^{13}\text{C}$  and  $^{19}\text{F}$  NMR spectra were recorded either on V-NMRS 400 or Varian Mercury 300 spectrometer.  $^1\text{H}$  spectra are referenced to residual solvent signals;  $\text{CDCl}_3$  7.26 ppm; benzene- $d_6$  7.16 ppm and THF- $d_8$  1.73 ppm. Chemical shifts ( $\delta$ ) of  $^{19}\text{F}$  NMR spectra are reported in ppm relative to trifluorotoluene (-63.18 ppm). Chemical shifts ( $\delta$ ) of  $^{31}\text{P}$  NMR spectra are given in ppm relative to trimethyl phosphate (2.36 ppm). Coupling constants ( $J$ ) are reported in Hz and coupling patterns are described as br = broad, s = singlet, d = doublet, t = triplet, q = quartet, m = multiplet.

$\text{Ni}(\text{cod})_2$ , dppf, and anhydrous benzene were purchased from Sigma Aldrich. Toluene, THF and hexane were dried by solvent purification system (Innovative Technology PS-MD-5). Unless otherwise stated, all starting materials were commercially available and used as received.  $(\text{Me}_4\text{N})\text{SCF}_3$ ,<sup>1</sup>  $(\text{dppf})\text{Ni}(\text{cod})_2$ ,<sup>2</sup>  $(\text{dppf})\text{NiCl}_2$  and  $(\text{dme})_2\text{NiI}_2$ <sup>3</sup> were prepared according to their corresponding literature procedures.

### 1.1. Trifluoromethylthiolation with dppf / $\text{Ni}(\text{cod})_2$ catalyst

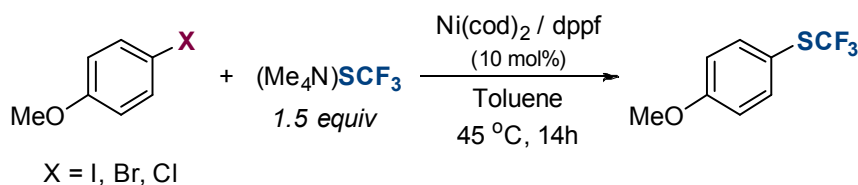

In an argon filled glovebox, a mixture of  $\text{Ni}(\text{cod})_2$  (2.8 mg, 0.01 mmol), dppf (5.5 mg, 0.01 mmol), and  $(\text{Me}_4\text{N})\text{SCF}_3$  (26 mg, 0.15 mmol) in dry toluene (0.5 mL) was stirred at room temperature for 5 min, followed by the addition of aryl halide (0.1 mmol). The suspension was stirred at 45 °C for 12-15 h. Subsequently a known amount of trifluorotoluene was added as an internal standard and conversion to the trifluoromethylthiolated product was determined by quantitative  $^{19}\text{F}$  NMR analysis.

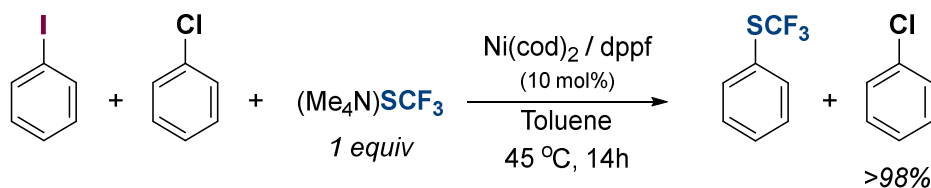

In an argon filled glovebox, a mixture of  $\text{Ni}(\text{cod})_2$  (2.8 mg, 0.01 mmol), dppf (5.5 mg, 0.01 mmol), and  $(\text{Me}_4\text{N})\text{SCF}_3$  (18 mg, 0.1 mmol) in dry toluene (0.5 mL) was stirred at room temperature for 5 min, followed by the addition of chlorobenzene and iodobenzene (0.1 mmol each). The suspension was stirred at 45 °C for 12-15 h. Subsequently a known amount of mesitylene was added as an internal standard and conversion to the trifluoromethylthiolated product as well as the amount of remaining starting materials was determined by calibrated GC/MS analysis. The yield of the formed product was further verified by  $^{19}\text{F}$  NMR analysis using trifluorotoluene as internal standard.

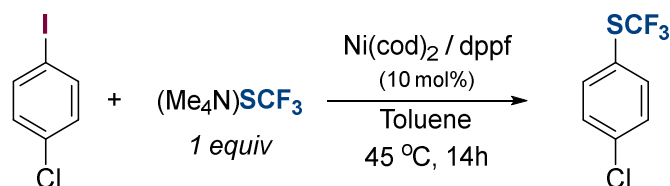

In an argon filled glovebox, a mixture of  $\text{Ni(cod)}_2$  (2.8 mg, 0.01 mmol),  $\text{dppf}$  (5.5 mg, 0.01 mmol), and  $(\text{Me}_4\text{N})\text{SCF}_3$  (18 mg, 0.1 mmol) in dry toluene (0.5 mL) was stirred at room temperature for 5 min, followed by the addition of aryl halide (24 mg, 0.1 mmol). The suspension was stirred at 45 °C for 12-15 h. Subsequently a known amount of trifluorotoluene was added as an internal standard and conversion to the trifluoromethylthiolated products was determined by quantitative  $^{19}\text{F}$  NMR and GC/MS analyses.

## 1.2. Studies into $\text{SCF}_2$ formation

Thermal decomposition of  $(\text{Me}_4\text{N})\text{SCF}_3$  under catalytically relevant conditions:

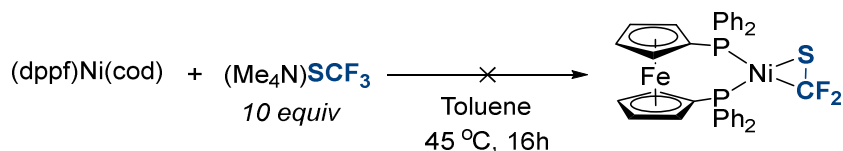

In an argon filled glovebox, a mixture of  $(\text{dppf})\text{Ni(cod)}$  (7.2 mg, 0.01 mmol) and  $(\text{Me}_4\text{N})\text{SCF}_3$  (18 mg, 0.1 mmol) in dry toluene (0.7 mL) was stirred at 45 °C for 16 h. The mixture was subsequently analyzed by  $^{19}\text{F}$  and  $^{31}\text{P}$  NMR and no conversion to  $(\text{dppf})\text{Ni(SCF}_2)$  as well as to any other F- or P-containing species was observed.

Reaction between  $(\text{dppf})\text{NiCl}$  and  $(\text{Me}_4\text{N})\text{SCF}_3$ :

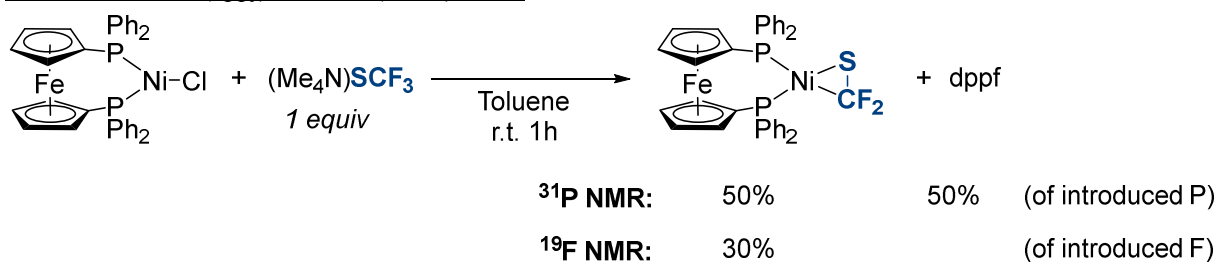

In an argon filled glovebox, a mixture of  $(\text{dppf})\text{NiCl}$  (20 mg, 0.031 mmol) and  $(\text{Me}_4\text{N})\text{SCF}_3$  (5.4 mg, 0.031 mmol) in dry toluene (1.5 mL) was stirred at room temperature for 1 h, after which the solution had turned orange and a green precipitate had formed. A known amount of trifluorotoluene and triethyl phosphate were subsequently added and the formed species were quantified by  $^{19}\text{F}$  and  $^{31}\text{P}$  NMR analysis.

After 30 minutes the solution phase was also orange, along with a dark red precipitate.  $^{31}\text{P}$  NMR analysis revealed there to be only  $(\text{dppf})\text{Ni(SCF}_2)$  present and no free ligand, suggesting that it is likely formed *via* the decomposition of the dark red precipitate. On a preparative scale it is however difficult to isolate the material at the time when there would not be any unreacted starting material or free  $\text{dppf}$  impurity present.

Crystals suitable for X-ray analysis were grown from the reaction mixture in toluene that was filtered through celite after 30 minutes running time. Slow diffusion of hexane through gas phase was used to induce crystal formation.

All the ellipsoids are drawn at 50% probability.

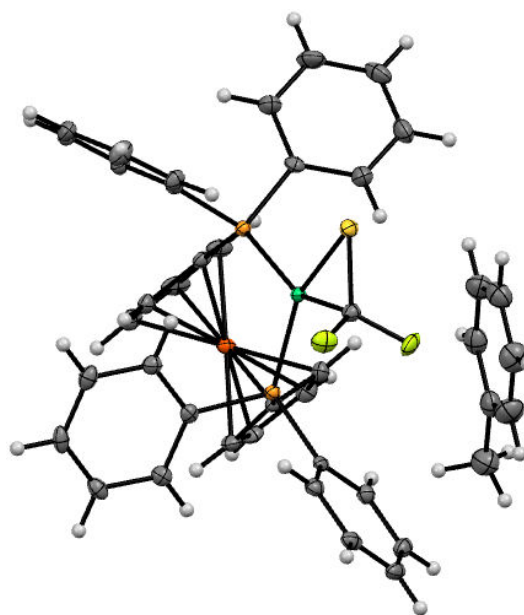

Formation of  $(dppf)Ni(SCF_2)$  via oxidative addition:

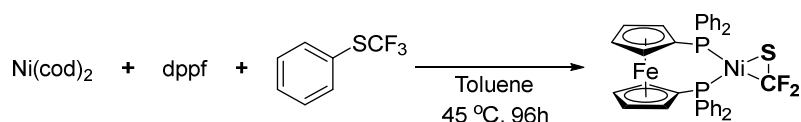

Inside an argon filled glovebox,  $Ni(cod)_2$  (138 mg, 0.5 mmol),  $dppf$  (282 mg, 0.505 mmol) and benzene (10 mL) were added to a vial. The solution was stirred for 10 min at room temperature, and then phenyl trifluoromethyl sulfide (1 mL) was added. The solution was stirred at 45 °C for 96 hours, followed by the isolation of the solid material by filtration. The obtained dark green solid was subsequently recrystallized from benzene/hexane to yield 70 mg of pale orange solid (20% yield).  $^1H$  NMR (300 MHz,  $C_6D_6$ )  $\delta$  (ppm) 7.95 (m, 8H), 7.02 (br, 12H), 4.37 (br, 2H), 4.02 (br, 2H), 3.86 (br, 2H), 3.77 (br, 2H).  $^{19}F$  NMR (282 MHz,  $C_6D_6$ )  $\delta$  (ppm) -44.75 (dd,  $J = 37.6, 23.0$  Hz).  $^{31}P$  NMR (121 MHz,  $C_6D_6$ )  $\delta$  (ppm) 30.82 (t,  $J = 23.0$  Hz), 22.10 (t,  $J = 37.6$  Hz).

## 2. Synthetic procedures

### 2.1. Preparation of Ni<sup>(I)</sup> I- and Br-complexes

#### Preparation of (dppf)Ni<sup>(I)</sup>Br via oxidative addition:

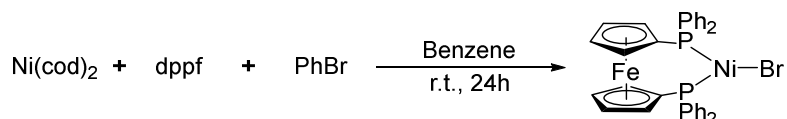

Inside an argon filled glovebox, Ni(cod)<sub>2</sub> (138 mg, 0.5 mmol), dppf (282 mg, 0.505 mmol), and benzene (10 mL) were added to a 20 mL vial. The solution was stirred at room temperature for 5 minutes, after which 1 mL of bromobenzene was added. Additional stirring for 24 hours, yielded an orange suspension. After filtration and washing with hexane, orange powder (231 mg) was collected, 67% yield. Crystals suitable for X-ray analysis were grown by slow diffusion of hexane through gas phase into a moderately concentrated solution of the title compound in benzene (400 μL saturated solution + 100 μL benzene) at room temperature.

All the ellipsoids are drawn at 50% probability. C<sub>6</sub>H<sub>6</sub> is omitted for clarity.

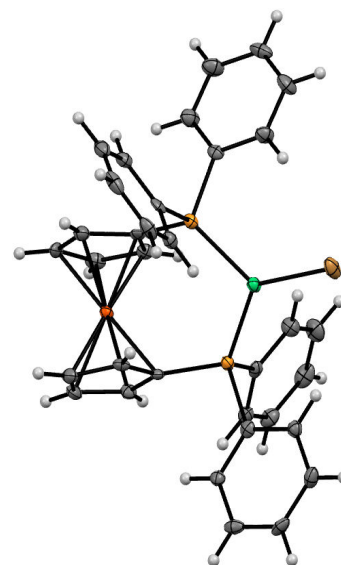

#### Preparation of (dppf)Ni<sup>(I)</sup>Br via comproportionation:

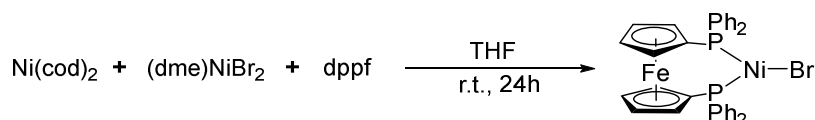

Inside an argon filled glovebox, Ni(cod)<sub>2</sub> (55 mg, 0.2 mmol), dppf (222 mg, 0.4 mmol), (dme)NiBr<sub>2</sub> (61 mg, 0.2 mmol) and THF (10 mL) were added to a 20 mL vial. The solution was stirred at room temperature for 24 hours, after which an orange suspension had formed. After filtration and washing with hexane, orange powder (174 mg) was collected, 63% yield. Paramagnetic <sup>1</sup>H NMR (400 MHz, C<sub>6</sub>D<sub>6</sub>) δ (ppm) 12.7 (br), 4.5 (br), 1.3 (br).

Preparation of (dppf)Ni<sup>0</sup>I via oxidative addition:

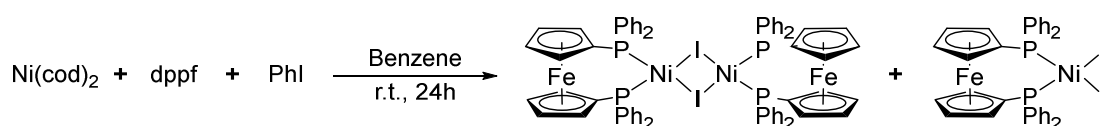

Inside an argon filled glovebox, Ni(cod)<sub>2</sub> (138 mg, 0.5 mmol), dppf (282 mg, 0.505 mmol), and benzene (10 mL) were added to a 20 mL vial. The solution was stirred at room temperature for 5 minutes, after which 1 mL of iodobenzene was added. Additional stirring for 24 hours, yielded an orange suspension had formed. After filtration and washing with hexane, orange-purplish powder (231 mg) was collected, 67% yield. <sup>1</sup>H NMR analysis indicated the isolated material to be a mixture of (dppf)Ni<sup>(I)</sup>I and (dppf)Ni<sup>(II)</sup>I<sub>2</sub>. The latter is not observed when the reaction is run on a more dilute NMR experiment scale (0.01 mmol in 0.7 mL), suggesting that its (NiI<sub>2</sub>) isolation may be associated with its poor solubility in benzene.

<sup>1</sup>H NMR spectrum of (dppf)Ni<sup>(II)</sup>I<sub>2</sub> contains characteristic signals at 19.8 and -2.8 ppm (as determined after mixing (dme)<sub>2</sub>NiI<sub>2</sub> and dppf in THF-*d*<sub>8</sub> or C<sub>6</sub>D<sub>6</sub> for 1h).

Attempt to grow single crystal of the isolated impure material from THF yielded a dimeric (dppf)Ni<sup>(I)</sup>I, whereas crystallization from benzene yielded (dppf)Ni<sup>(II)</sup>I<sub>2</sub>. Crystals suitable for X-ray analysis were grown by slow diffusion of hexane through gas phase into a solution of the isolated material at room temperature.

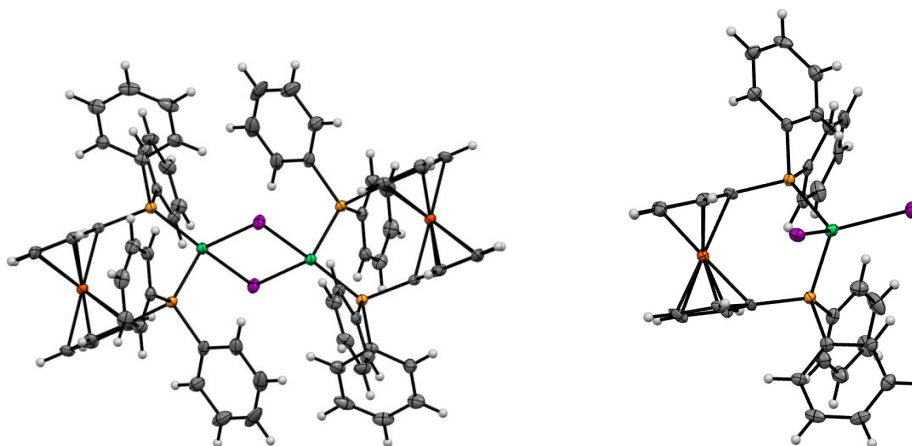

All the ellipsoids are drawn at 50% probability.  
THF is omitted for clarity.

All the ellipsoids are drawn at 50% probability.  
C<sub>6</sub>H<sub>6</sub> is omitted for clarity.

Preparation of (dppf)Ni<sup>0</sup>I via comproportionation:

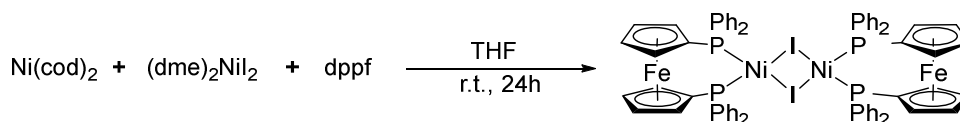

Inside an argon filled glovebox, Ni(cod)<sub>2</sub> (55 mg, 0.2 mmol), dppf (222 mg, 0.4 mmol), (dme)<sub>2</sub>NiI<sub>2</sub> (98 mg, 0.2 mmol) and THF (10 mL) were added to a 20 mL vial. The solution was stirred at room temperature for 24 hours, after which the reaction mixture had turned greenish-purple. After filtration and washing with hexane, dark greenish orange powder (168 mg) was collected, 57% yield. Paramagnetic <sup>1</sup>H NMR (400 MHz, C<sub>6</sub>D<sub>6</sub>) δ (ppm) 12.8 (br), 4.4 (br).

### 3. Crystallographic data

|                                                                            | (dppf)Ni(SCF <sub>2</sub> )                                                                        | (dppf)Ni <sup>(0)</sup> Br                                                           | [(dppf)Ni <sup>(0)</sup> I] <sub>2</sub>                                                                                        | (dppf)Ni <sup>(0)</sup> I <sub>2</sub>                                                            |
|----------------------------------------------------------------------------|----------------------------------------------------------------------------------------------------|--------------------------------------------------------------------------------------|---------------------------------------------------------------------------------------------------------------------------------|---------------------------------------------------------------------------------------------------|
| Chemical formula                                                           | C <sub>34</sub> H <sub>28</sub> F <sub>2</sub> FeNiP <sub>2</sub> S, C <sub>7</sub> H <sub>8</sub> | C <sub>34</sub> H <sub>28</sub> BrFeNiP <sub>2</sub> , C <sub>6</sub> H <sub>6</sub> | C <sub>68</sub> H <sub>56</sub> Fe <sub>2</sub> I <sub>2</sub> Ni <sub>2</sub> P <sub>4</sub> , C <sub>4</sub> H <sub>8</sub> O | C <sub>34</sub> H <sub>28</sub> FeI <sub>2</sub> NiP <sub>2</sub> , C <sub>6</sub> H <sub>6</sub> |
| <i>M<sub>r</sub></i>                                                       | 787.27                                                                                             | 771.08                                                                               | 1552.03                                                                                                                         | 944.97                                                                                            |
| Crystal system, space group                                                | Triclinic, <i>P</i> $\bar{1}$                                                                      | Triclinic, <i>P</i> $\bar{1}$                                                        | Monoclinic, C2/c                                                                                                                | Triclinic, <i>P</i> $\bar{1}$                                                                     |
| <i>a</i> , <i>b</i> , <i>c</i> (Å)                                         | 11.2326(10)<br>11.3360(10)<br>16.1197(14)                                                          | 9.6075(11)<br>10.9191(13)<br>17.624(2)                                               | 23.6771(5)<br>13.9547(3)<br>19.1841(4)                                                                                          | 8.9532(2)<br>10.0303(3)<br>20.4331(11)                                                            |
| $\alpha$ , $\beta$ , $\gamma$ (°)                                          | 78.1070(10)<br>72.5100(10)<br>67.2790(10)                                                          | 96.565(2)<br>105.405(2)<br>103.759(2)                                                | 90<br>90.394(2)<br>90                                                                                                           | 91.917(3)<br>99.127(4)<br>94.971(2)                                                               |
| <i>V</i> (Å <sup>3</sup> )                                                 | 1796.3(3)                                                                                          | 1699.9(3)                                                                            | 6338.4(2)                                                                                                                       | 1802.83(12)                                                                                       |
| <i>Z</i>                                                                   | 2                                                                                                  | 2                                                                                    | 4                                                                                                                               | 2                                                                                                 |
| Radiation type                                                             | Mo K $\alpha$                                                                                      | Mo K $\alpha$                                                                        | Mo K $\alpha$                                                                                                                   | Mo K $\alpha$                                                                                     |
| $\mu$ (mm <sup>-1</sup> )                                                  | 1.116                                                                                              | 2.278                                                                                | 2.153                                                                                                                           | 2.754                                                                                             |
| Crystal size (mm)                                                          | 0.30 x 0.30 x 0.21                                                                                 | 0.18 x 0.15 x 0.04                                                                   | 0.06 x 0.05 x 0.04                                                                                                              | 0.07 x 0.05 x 0.03                                                                                |
| Total/unique reflections                                                   | 22492, 7576                                                                                        | 19061, 6202                                                                          | 41356, 7243                                                                                                                     | 9996, <i>twinned crystal</i>                                                                      |
| <i>R</i> <sub>int</sub>                                                    | 0.0529                                                                                             | 0.0622                                                                               | 0.060                                                                                                                           | <i>twinned crystal</i>                                                                            |
| <i>R</i> ( <i>F</i> <sup>2</sup> > 2 $\sigma$ ( <i>F</i> <sup>2</sup> ))   | 0.0345                                                                                             | 0.0383                                                                               | 0.0395                                                                                                                          | 0.0415                                                                                            |
| <i>wR</i> <sub>2</sub> ( <i>F</i> <sup>2</sup> )                           | 0.0849                                                                                             | 0.0872                                                                               | 0.0798                                                                                                                          | 0.0878                                                                                            |
| <i>GoF</i>                                                                 | 1.028                                                                                              | 1.009                                                                                | 1.017                                                                                                                           | 1.071                                                                                             |
| No. of reflections                                                         | 7576                                                                                               | 6202                                                                                 | 7243                                                                                                                            | 9996                                                                                              |
| No. of parameters                                                          | 443                                                                                                | 406                                                                                  | 397                                                                                                                             | 416                                                                                               |
| No. of restraints                                                          | 0                                                                                                  | 0                                                                                    | 30                                                                                                                              | 0                                                                                                 |
| $\Delta$ > <sub>max</sub> , $\Delta$ > <sub>min</sub> (e Å <sup>-3</sup> ) | 0.424, -0.467                                                                                      | 0.933, -0.374                                                                        | 1.098, -0.435                                                                                                                   | 3.023, -0.982                                                                                     |
| CCDC Number                                                                | 1528670                                                                                            | 1528671                                                                              | 1528182                                                                                                                         | 1528181                                                                                           |



### 3.1. Structural details of (dppf)Ni<sup>(I)</sup>Br

To investigate a possible electronic exchange between the Ni-center and the ferrocene ligand (e.g. whether it is truly Ni<sup>(I)</sup>/Fe<sup>(II)</sup> and not Ni<sup>(0)</sup>/Fe<sup>(III)</sup>), we performed calculations of the spin density in (dppf)Ni<sup>(I)</sup>Br complex. The obtained results indicate that the unpaired electron in this complex is localized predominantly on the Ni center (Figure S1).

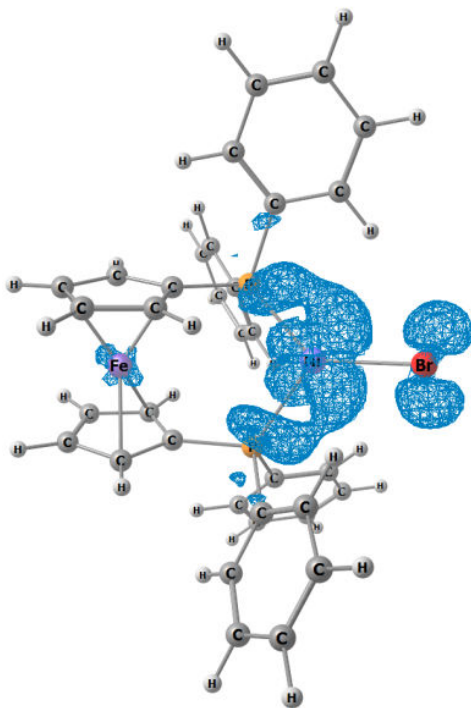

**Figure S1.** Spin density analysis for (dppf)Ni<sup>(I)</sup>Br, calculated at CPCM (Toluene) M06L/def2TZVP //  $\omega$ B97XD/6-31G(d) SDD level of theory.

Furthermore, we also compared the average C-Fe distances in the ferrocene moieties of the obtained crystal structures with the corresponding distances in Fe<sup>(II)</sup> (CCDC 1154857) and Fe<sup>(III)</sup> (CCDC 194434, 170258, 138350 and 1194362) ferrocenes. The data, shown in the Table S1 indicate that the ferrocene units in our Ni<sup>(I)</sup> complexes are more similar to Fe<sup>(II)</sup> ferrocene.

**Table S1.** Comparison of average C-Fe distances in Fe<sup>(II)</sup> and Fe<sup>(III)</sup> ferrocenes and (dppf)Ni complexes.

| Complex                         | Average C-Fe distance (Å) |
|---------------------------------|---------------------------|
| Fe <sup>(II)</sup> ferrocene    | 2.045                     |
| Fe <sup>(III)</sup> ferrocene   | 2.065                     |
| (dppf)Ni <sup>(I)</sup> Br      | 2.041                     |
| (dppf)Ni <sup>(I)</sup> I dimer | 2.042                     |
| (dppf)Ni <sup>(0)</sup> (cod)   | 2.044                     |

## 4. Computational details

All calculations were performed using Gaussian 09 software.<sup>4</sup> Structural optimizations and frequency calculations were performed with  $\omega$ B97XD method along with 6-31G(d) basis set and the SDD ECP on Ni and Fe atoms. Single point energy calculations were performed with M06 and M06L methods and def2-TZVP basis set. Solvent effects of toluene and THF were included using the CPCM solvation model. Frequency calculations were performed to confirm whether the structure is a minimum or a transition state. Intrinsic reaction coordinate (IRC) analysis was used to confirm that the obtained transition states connect the correct minima. Energies of all structures are corrected to 1M standard state with the addition of a constant of 1.89 kcal/mol.<sup>5</sup> Both singlet and triplet spin states were considered for Ni(II) complexes, with the lowest energy ones reported herein.

### Energetic and thermal data for computed structures

#### **MeO-Ph-Cl**

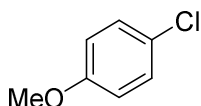

|                                              |                             |
|----------------------------------------------|-----------------------------|
| Zero-point correction=                       | 0.125560 (Hartree/Particle) |
| Thermal correction to Energy=                | 0.133511                    |
| Thermal correction to Enthalpy=              | 0.134456                    |
| Thermal correction to Gibbs Free Energy=     | 0.092354                    |
| Sum of electronic and zero-point Energies=   | -806.101249                 |
| Sum of electronic and thermal Energies=      | -806.093298                 |
| Sum of electronic and thermal Enthalpies=    | -806.092353                 |
| Sum of electronic and thermal Free Energies= | -806.134455                 |

CPCM (Toluene) M06L/def2TZVP E = -806.457700124

#### **MeO-Ph-Br**

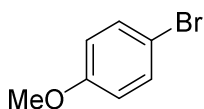

|                                              |                             |
|----------------------------------------------|-----------------------------|
| Zero-point correction=                       | 0.125022 (Hartree/Particle) |
| Thermal correction to Energy=                | 0.133254                    |
| Thermal correction to Enthalpy=              | 0.134199                    |
| Thermal correction to Gibbs Free Energy=     | 0.090526                    |
| Sum of electronic and zero-point Energies=   | -2917.353822                |
| Sum of electronic and thermal Energies=      | -2917.345589                |
| Sum of electronic and thermal Enthalpies=    | -2917.344645                |
| Sum of electronic and thermal Free Energies= | -2917.388318                |

CPCM (Toluene) M06L/def2TZVP E = -2920.31216203

### MeO-Ph-I

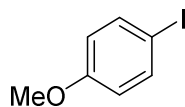

|                                              |                             |
|----------------------------------------------|-----------------------------|
| Zero-point correction=                       | 0.124817 (Hartree/Particle) |
| Thermal correction to Energy=                | 0.133128                    |
| Thermal correction to Enthalpy=              | 0.134072                    |
| Thermal correction to Gibbs Free Energy=     | 0.089764                    |
| Sum of electronic and zero-point Energies=   | -357.342624                 |
| Sum of electronic and thermal Energies=      | -357.334313                 |
| Sum of electronic and thermal Enthalpies=    | -357.333368                 |
| Sum of electronic and thermal Free Energies= | -357.377676                 |

CPCM (Toluene) M06L/def2TZVP E = -644.124891465

### [(dppf)Ni<sup>0</sup>(cod)]

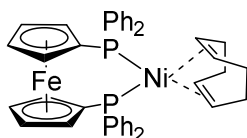

|                                              |                             |
|----------------------------------------------|-----------------------------|
| Zero-point correction=                       | 0.712882 (Hartree/Particle) |
| Thermal correction to Energy=                | 0.752464                    |
| Thermal correction to Enthalpy=              | 0.753408                    |
| Thermal correction to Gibbs Free Energy=     | 0.641932                    |
| Sum of electronic and zero-point Energies=   | -2600.878556                |
| Sum of electronic and thermal Energies=      | -2600.838974                |
| Sum of electronic and thermal Enthalpies=    | -2600.838030                |
| Sum of electronic and thermal Free Energies= | -2600.949506                |

CPCM (Toluene) M06L/def2TZVP E = -5079.72044133

CPCM (Toluene) M06/def2TZVP E = -5078.57741291

### TS-OA-ArCl

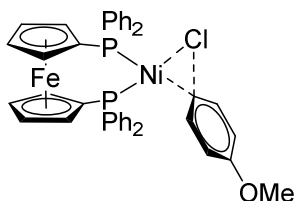

|                                              |                             |
|----------------------------------------------|-----------------------------|
| Zero-point correction=                       | 0.650568 (Hartree/Particle) |
| Thermal correction to Energy=                | 0.692698                    |
| Thermal correction to Enthalpy=              | 0.693642                    |
| Thermal correction to Gibbs Free Energy=     | 0.572084                    |
| Sum of electronic and zero-point Energies=   | -3095.184115                |
| Sum of electronic and thermal Energies=      | -3095.141985                |
| Sum of electronic and thermal Enthalpies=    | -3095.141041                |
| Sum of electronic and thermal Free Energies= | -3095.262599                |

CPCM (Toluene) M06L/def2TZVP E = -5574.03756636

### TS-OA-ArBr

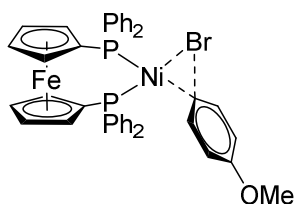

|                                              |                             |
|----------------------------------------------|-----------------------------|
| Zero-point correction=                       | 0.650998 (Hartree/Particle) |
| Thermal correction to Energy=                | 0.692166                    |
| Thermal correction to Enthalpy=              | 0.693110                    |
| Thermal correction to Gibbs Free Energy=     | 0.575356                    |
| Sum of electronic and zero-point Energies=   | -5206.448728                |
| Sum of electronic and thermal Energies=      | -5206.407560                |
| Sum of electronic and thermal Enthalpies=    | -5206.406616                |
| Sum of electronic and thermal Free Energies= | -5206.524370                |

CPCM (Toluene) M06L/def2TZVP E = -7687.89995235

### TS-OA-ArI

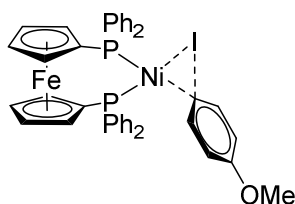

|                                              |                             |
|----------------------------------------------|-----------------------------|
| Zero-point correction=                       | 0.651107 (Hartree/Particle) |
| Thermal correction to Energy=                | 0.692317                    |
| Thermal correction to Enthalpy=              | 0.693262                    |
| Thermal correction to Gibbs Free Energy=     | 0.575259                    |
| Sum of electronic and zero-point Energies=   | -2646.446733                |
| Sum of electronic and thermal Energies=      | -2646.405523                |
| Sum of electronic and thermal Enthalpies=    | -2646.404578                |
| Sum of electronic and thermal Free Energies= | -2646.522581                |

CPCM (Toluene) M06L/def2TZVP E = -5411.72153315

### 1,5-cyclooctadiene

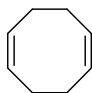

|                                              |                             |
|----------------------------------------------|-----------------------------|
| Zero-point correction=                       | 0.183361 (Hartree/Particle) |
| Thermal correction to Energy=                | 0.190701                    |
| Thermal correction to Enthalpy=              | 0.191646                    |
| Thermal correction to Gibbs Free Energy=     | 0.151915                    |
| Sum of electronic and zero-point Energies=   | -311.745607                 |
| Sum of electronic and thermal Energies=      | -311.738266                 |
| Sum of electronic and thermal Enthalpies=    | -311.737322                 |
| Sum of electronic and thermal Free Energies= | -311.777053                 |

CPCM (Toluene) M06L/def2TZVP E = -312.0931233  
CPCM (Toluene) M06/def2TZVP E = -311.885770491  
CPCM (THF) M06/def2TZVP E = -311.886489619

**(dppf)Ni(SCF<sub>2</sub>)**

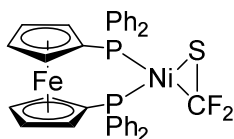

|                                              |                             |
|----------------------------------------------|-----------------------------|
| Zero-point correction=                       | 0.540297 (Hartree/Particle) |
| Thermal correction to Energy=                | 0.577186                    |
| Thermal correction to Enthalpy=              | 0.578130                    |
| Thermal correction to Gibbs Free Energy=     | 0.468722                    |
| Sum of electronic and zero-point Energies=   | -2925.008081                |
| Sum of electronic and thermal Energies=      | -2924.971193                |
| Sum of electronic and thermal Enthalpies=    | -2924.970249                |
| Sum of electronic and thermal Free Energies= | -2925.079656                |

CPCM (Toluene) M06L/def2TZVP E = -5403.69208574

**(dppf)Ni(Ph)(SCF<sub>3</sub>)**

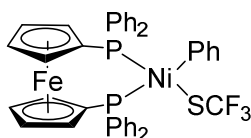

|                                              |                             |
|----------------------------------------------|-----------------------------|
| Zero-point correction=                       | 0.635991 (Hartree/Particle) |
| Thermal correction to Energy=                | 0.679119                    |
| Thermal correction to Enthalpy=              | 0.680063                    |
| Thermal correction to Gibbs Free Energy=     | 0.557839                    |
| Sum of electronic and zero-point Energies=   | -3256.282808                |
| Sum of electronic and thermal Energies=      | -3256.239680                |
| Sum of electronic and thermal Enthalpies=    | -3256.238735                |
| Sum of electronic and thermal Free Energies= | -3256.360960                |

CPCM (Toluene) M06/def2TZVP E = -5734.08229759

**TS-RE-PhSCF<sub>3</sub>**

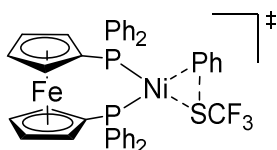

|                                              |                             |
|----------------------------------------------|-----------------------------|
| Zero-point correction=                       | 0.635105 (Hartree/Particle) |
| Thermal correction to Energy=                | 0.677832                    |
| Thermal correction to Enthalpy=              | 0.678776                    |
| Thermal correction to Gibbs Free Energy=     | 0.557630                    |
| Sum of electronic and zero-point Energies=   | -3256.255528                |
| Sum of electronic and thermal Energies=      | -3256.212802                |
| Sum of electronic and thermal Enthalpies=    | -3256.211857                |
| Sum of electronic and thermal Free Energies= | -3256.333004                |

CPCM (Toluene) M06/def2TZVP E = -5734.05622609

### *TS-βF-elim-PhSCF<sub>3</sub>*

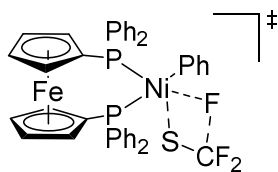

|                                              |                             |
|----------------------------------------------|-----------------------------|
| Zero-point correction=                       | 0.634900 (Hartree/Particle) |
| Thermal correction to Energy=                | 0.677967                    |
| Thermal correction to Enthalpy=              | 0.678911                    |
| Thermal correction to Gibbs Free Energy=     | 0.557817                    |
| Sum of electronic and zero-point Energies=   | -3256.253080                |
| Sum of electronic and thermal Energies=      | -3256.210014                |
| Sum of electronic and thermal Enthalpies=    | -3256.209069                |
| Sum of electronic and thermal Free Energies= | -3256.330164                |

CPCM (Toluene) M06/def2TZVP E = -5734.04455539

### *PhSCF<sub>3</sub>*

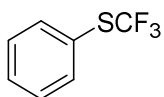

|                                              |                             |
|----------------------------------------------|-----------------------------|
| Zero-point correction=                       | 0.108184 (Hartree/Particle) |
| Thermal correction to Energy=                | 0.117609                    |
| Thermal correction to Enthalpy=              | 0.118553                    |
| Thermal correction to Gibbs Free Energy=     | 0.071274                    |
| Sum of electronic and zero-point Energies=   | -967.159310                 |
| Sum of electronic and thermal Energies=      | -967.149886                 |
| Sum of electronic and thermal Enthalpies=    | -967.148942                 |
| Sum of electronic and thermal Free Energies= | -967.196220                 |

CPCM (Toluene) M06/def2TZVP E = -967.397178728

CPCM (THF) M06/def2TZVP E = -967.398135792

### *(dppf)Ni(Ph)(F)*

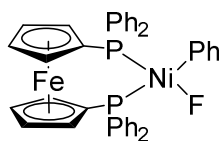

|                                              |                             |
|----------------------------------------------|-----------------------------|
| Zero-point correction=                       | 0.620929 (Hartree/Particle) |
| Thermal correction to Energy=                | 0.659966                    |
| Thermal correction to Enthalpy=              | 0.660910                    |
| Thermal correction to Gibbs Free Energy=     | 0.547259                    |
| Sum of electronic and zero-point Energies=   | -2620.399423                |
| Sum of electronic and thermal Energies=      | -2620.360387                |
| Sum of electronic and thermal Enthalpies=    | -2620.359443                |
| Sum of electronic and thermal Free Energies= | -2620.473093                |

CPCM (Toluene) M06/def2TZVP E = -5098.07454855

**(dppf)Ni(SCF<sub>3</sub>)**

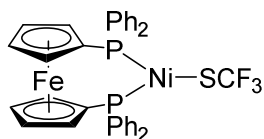

|                                              |                             |
|----------------------------------------------|-----------------------------|
| Zero-point correction=                       | 0.543054 (Hartree/Particle) |
| Thermal correction to Energy=                | 0.581734                    |
| Thermal correction to Enthalpy=              | 0.582678                    |
| Thermal correction to Gibbs Free Energy=     | 0.467024                    |
| Sum of electronic and zero-point Energies=   | -3024.844392                |
| Sum of electronic and thermal Energies=      | -3024.805712                |
| Sum of electronic and thermal Enthalpies=    | -3024.804768                |
| Sum of electronic and thermal Free Energies= | -3024.920421                |

CPCM (Toluene) M06/def2TZVP E = -5502.5638082

**TS-βF-elim-Ni<sup>(0)</sup>SCF<sub>3</sub>**

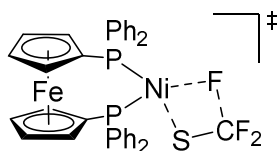

|                                              |                             |
|----------------------------------------------|-----------------------------|
| Zero-point correction=                       | 0.540907 (Hartree/Particle) |
| Thermal correction to Energy=                | 0.579795                    |
| Thermal correction to Enthalpy=              | 0.580739                    |
| Thermal correction to Gibbs Free Energy=     | 0.463477                    |
| Sum of electronic and zero-point Energies=   | -3024.808429                |
| Sum of electronic and thermal Energies=      | -3024.769541                |
| Sum of electronic and thermal Enthalpies=    | -3024.768596                |
| Sum of electronic and thermal Free Energies= | -3024.885859                |

CPCM (Toluene) M06/def2TZVP E = -5502.5273849

**SCF<sub>2</sub>**

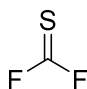

|                                              |                             |
|----------------------------------------------|-----------------------------|
| Zero-point correction=                       | 0.011698 (Hartree/Particle) |
| Thermal correction to Energy=                | 0.015249                    |
| Thermal correction to Enthalpy=              | 0.016193                    |
| Thermal correction to Gibbs Free Energy=     | -0.015171                   |
| Sum of electronic and zero-point Energies=   | -635.844412                 |
| Sum of electronic and thermal Energies=      | -635.840861                 |
| Sum of electronic and thermal Enthalpies=    | -635.839917                 |
| Sum of electronic and thermal Free Energies= | -635.871281                 |

CPCM (Toluene) M06/def2TZVP E = -635.97015519

CPCM (THF) M06/def2TZVP E = -635.970566068

**(dppf)Ni(Ph)(Cl)**

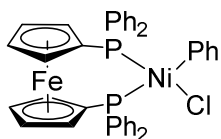

|                                              |                             |
|----------------------------------------------|-----------------------------|
| Zero-point correction=                       | 0.620308 (Hartree/Particle) |
| Thermal correction to Energy=                | 0.659080                    |
| Thermal correction to Enthalpy=              | 0.660024                    |
| Thermal correction to Gibbs Free Energy=     | 0.547509                    |
| Sum of electronic and zero-point Energies=   | -2980.774640                |
| Sum of electronic and thermal Energies=      | -2980.735868                |
| Sum of electronic and thermal Enthalpies=    | -2980.734924                |
| Sum of electronic and thermal Free Energies= | -2980.847439                |

CPCM (Toluene) M06L/def2TZVP E = -5459.53062821

**(dppf)Ni(Ph)(Br)**

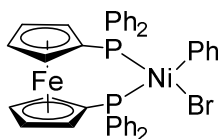

|                                              |                             |
|----------------------------------------------|-----------------------------|
| Zero-point correction=                       | 0.619667 (Hartree/Particle) |
| Thermal correction to Energy=                | 0.658672                    |
| Thermal correction to Enthalpy=              | 0.659616                    |
| Thermal correction to Gibbs Free Energy=     | 0.546416                    |
| Sum of electronic and zero-point Energies=   | -5092.035957                |
| Sum of electronic and thermal Energies=      | -5091.996951                |
| Sum of electronic and thermal Enthalpies=    | -5091.996007                |
| Sum of electronic and thermal Free Energies= | -5092.109207                |

CPCM (Toluene) M06L/def2TZVP E = -7573.38748299

**(dppf)Ni(Ph)(I)**

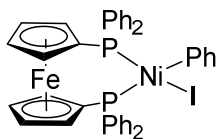

|                                              |                             |
|----------------------------------------------|-----------------------------|
| Zero-point correction=                       | 0.619840 (Hartree/Particle) |
| Thermal correction to Energy=                | 0.659836                    |
| Thermal correction to Enthalpy=              | 0.660780                    |
| Thermal correction to Gibbs Free Energy=     | 0.543574                    |
| Sum of electronic and zero-point Energies=   | -2532.033234                |
| Sum of electronic and thermal Energies=      | -2531.993239                |
| Sum of electronic and thermal Enthalpies=    | -2531.992295                |
| Sum of electronic and thermal Free Energies= | -2532.109501                |

CPCM (Toluene) M06L/def2TZVP E = -5297.20322026



**(dppf)Ni(Ph)<sub>2</sub>**

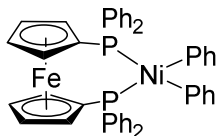

|                                              |                             |
|----------------------------------------------|-----------------------------|
| Zero-point correction=                       | 0.710525 (Hartree/Particle) |
| Thermal correction to Energy=                | 0.752431                    |
| Thermal correction to Enthalpy=              | 0.753375                    |
| Thermal correction to Gibbs Free Energy=     | 0.634654                    |
| Sum of electronic and zero-point Energies=   | -2752.027634                |
| Sum of electronic and thermal Energies=      | -2751.985728                |
| Sum of electronic and thermal Enthalpies=    | -2751.984783                |
| Sum of electronic and thermal Free Energies= | -2752.103505                |

CPCM (Toluene) M06L/def2TZVP E = -5230.96728508

**(dppf)Ni(Cl)<sub>2</sub>**

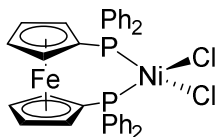

|                                              |                             |
|----------------------------------------------|-----------------------------|
| Zero-point correction=                       | 0.530181 (Hartree/Particle) |
| Thermal correction to Energy=                | 0.566395                    |
| Thermal correction to Enthalpy=              | 0.567339                    |
| Thermal correction to Gibbs Free Energy=     | 0.458453                    |
| Sum of electronic and zero-point Energies=   | -3209.568649                |
| Sum of electronic and thermal Energies=      | -3209.532435                |
| Sum of electronic and thermal Enthalpies=    | -3209.531491                |
| Sum of electronic and thermal Free Energies= | -3209.640377                |

CPCM (Toluene) M06L/def2TZVP E = -5688.11609826

**(dppf)Ni(Br)<sub>2</sub>**

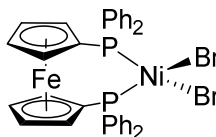

|                                              |                             |
|----------------------------------------------|-----------------------------|
| Zero-point correction=                       | 0.529653 (Hartree/Particle) |
| Thermal correction to Energy=                | 0.566355                    |
| Thermal correction to Enthalpy=              | 0.567299                    |
| Thermal correction to Gibbs Free Energy=     | 0.456116                    |
| Sum of electronic and zero-point Energies=   | -7432.085825                |
| Sum of electronic and thermal Energies=      | -7432.049123                |
| Sum of electronic and thermal Enthalpies=    | -7432.048179                |
| Sum of electronic and thermal Free Energies= | -7432.159363                |

CPCM (Toluene) M06L/def2TZVP E = -9915.82440917

**(dppf)Ni(I)<sub>2</sub>**

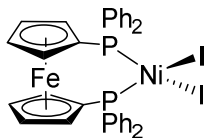

|                                              |                             |
|----------------------------------------------|-----------------------------|
| Zero-point correction=                       | 0.529459 (Hartree/Particle) |
| Thermal correction to Energy=                | 0.566372                    |
| Thermal correction to Enthalpy=              | 0.567317                    |
| Thermal correction to Gibbs Free Energy=     | 0.453669                    |
| Sum of electronic and zero-point Energies=   | -2312.071896                |
| Sum of electronic and thermal Energies=      | -2312.034983                |
| Sum of electronic and thermal Enthalpies=    | -2312.034039                |
| Sum of electronic and thermal Free Energies= | -2312.147687                |

CPCM (Toluene) M06L/def2TZVP E = -5363.45083194

**(dppf)NiCl**

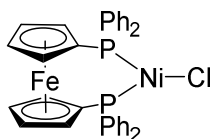

|                                              |                             |
|----------------------------------------------|-----------------------------|
| Zero-point correction=                       | 0.527940 (Hartree/Particle) |
| Thermal correction to Energy=                | 0.562598                    |
| Thermal correction to Enthalpy=              | 0.563542                    |
| Thermal correction to Gibbs Free Energy=     | 0.455804                    |
| Sum of electronic and zero-point Energies=   | -2749.342480                |
| Sum of electronic and thermal Energies=      | -2749.307822                |
| Sum of electronic and thermal Enthalpies=    | -2749.306878                |
| Sum of electronic and thermal Free Energies= | -2749.414616                |

CPCM (Toluene) M06L/def2TZVP E = -5227.85718500

**(dppf)NiBr**

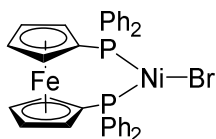

|                                              |                             |
|----------------------------------------------|-----------------------------|
| Zero-point correction=                       | 0.527769 (Hartree/Particle) |
| Thermal correction to Energy=                | 0.562598                    |
| Thermal correction to Enthalpy=              | 0.563543                    |
| Thermal correction to Gibbs Free Energy=     | 0.454749                    |
| Sum of electronic and zero-point Energies=   | -4860.602976                |
| Sum of electronic and thermal Energies=      | -4860.568147                |
| Sum of electronic and thermal Enthalpies=    | -4860.567202                |
| Sum of electronic and thermal Free Energies= | -4860.675996                |

CPCM (Toluene) M06L/def2TZVP E = -7341.71262698

**(dppf)NiI**

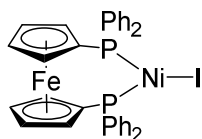

|                                              |                             |
|----------------------------------------------|-----------------------------|
| Zero-point correction=                       | 0.527389 (Hartree/Particle) |
| Thermal correction to Energy=                | 0.562338                    |
| Thermal correction to Enthalpy=              | 0.563282                    |
| Thermal correction to Gibbs Free Energy=     | 0.454906                    |
| Sum of electronic and zero-point Energies=   | -2300.600091                |
| Sum of electronic and thermal Energies=      | -2300.565141                |
| Sum of electronic and thermal Enthalpies=    | -2300.564197                |
| Sum of electronic and thermal Free Energies= | -2300.672574                |

CPCM (Toluene) M06L/def2TZVP E = -5065.52607106

**Ph-Ph**

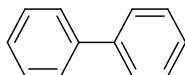

|                                              |                             |
|----------------------------------------------|-----------------------------|
| Zero-point correction=                       | 0.184206 (Hartree/Particle) |
| Thermal correction to Energy=                | 0.192989                    |
| Thermal correction to Enthalpy=              | 0.193933                    |
| Thermal correction to Gibbs Free Energy=     | 0.150365                    |
| Sum of electronic and zero-point Energies=   | -462.953471                 |
| Sum of electronic and thermal Energies=      | -462.944689                 |
| Sum of electronic and thermal Enthalpies=    | -462.943744                 |
| Sum of electronic and thermal Free Energies= | -462.987312                 |

CPCM (Toluene) M06L/def2TZVP E = -463.400094216

**TS-OA-PhI-(dppf)Ni(SCF<sub>3</sub>)**

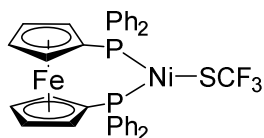

|                                              |                             |
|----------------------------------------------|-----------------------------|
| Zero-point correction=                       | 0.637088 (Hartree/Particle) |
| Thermal correction to Energy=                | 0.682119                    |
| Thermal correction to Enthalpy=              | 0.683063                    |
| Thermal correction to Gibbs Free Energy=     | 0.556454                    |
| Sum of electronic and zero-point Energies=   | -3267.712570                |
| Sum of electronic and thermal Energies=      | -3267.667540                |
| Sum of electronic and thermal Enthalpies=    | -3267.666596                |
| Sum of electronic and thermal Free Energies= | -3267.793204                |

CPCM (Toluene) M06/def2TZVP E = -6031.84687603

**Ph-I**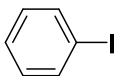

|                                              |                             |
|----------------------------------------------|-----------------------------|
| Zero-point correction=                       | 0.091513 (Hartree/Particle) |
| Thermal correction to Energy=                | 0.097310                    |
| Thermal correction to Enthalpy=              | 0.098254                    |
| Thermal correction to Gibbs Free Energy=     | 0.060505                    |
| Sum of electronic and zero-point Energies=   | -242.888371                 |
| Sum of electronic and thermal Energies=      | -242.882573                 |
| Sum of electronic and thermal Enthalpies=    | -242.881629                 |
| Sum of electronic and thermal Free Energies= | -242.919379                 |
| CPCM (Toluene) M06/def2TZVP E = -529.309413  |                             |
| CPCM (THF) M06/def2TZVP E = -529.310339402   |                             |

**(dmbpy)Ni(Ph)(SCF<sub>3</sub>)**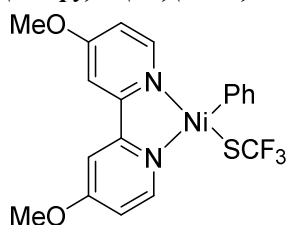

|                                              |                             |
|----------------------------------------------|-----------------------------|
| Zero-point correction=                       | 0.338518 (Hartree/Particle) |
| Thermal correction to Energy=                | 0.363609                    |
| Thermal correction to Enthalpy=              | 0.364553                    |
| Thermal correction to Gibbs Free Energy=     | 0.282062                    |
| Sum of electronic and zero-point Energies=   | -1862.130925                |
| Sum of electronic and thermal Energies=      | -1862.105834                |
| Sum of electronic and thermal Enthalpies=    | -1862.104889                |
| Sum of electronic and thermal Free Energies= | -1862.187381                |
| CPCM (THF) M06/def2TZVP E = -3199.99227758   |                             |

**TS-RE-(dmbpy)Ni(Ph)(SCF<sub>3</sub>)**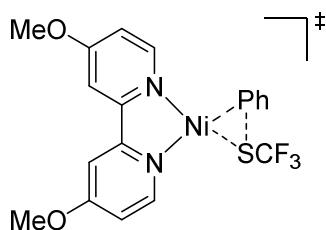

|                                              |                             |
|----------------------------------------------|-----------------------------|
| Zero-point correction=                       | 0.335985 (Hartree/Particle) |
| Thermal correction to Energy=                | 0.361540                    |
| Thermal correction to Enthalpy=              | 0.362484                    |
| Thermal correction to Gibbs Free Energy=     | 0.278418                    |
| Sum of electronic and zero-point Energies=   | -1862.067215                |
| Sum of electronic and thermal Energies=      | -1862.041660                |
| Sum of electronic and thermal Enthalpies=    | -1862.040716                |
| Sum of electronic and thermal Free Energies= | -1862.124782                |
| CPCM (THF) M06/def2TZVP E = -3199.93580732   |                             |

**(dmbpy)Ni(cod)**

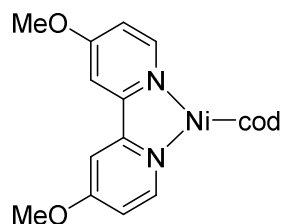

|                                              |                             |
|----------------------------------------------|-----------------------------|
| Zero-point correction=                       | 0.411979 (Hartree/Particle) |
| Thermal correction to Energy=                | 0.435055                    |
| Thermal correction to Enthalpy=              | 0.435999                    |
| Thermal correction to Gibbs Free Energy=     | 0.359302                    |
| Sum of electronic and zero-point Energies=   | -1206.691394                |
| Sum of electronic and thermal Energies=      | -1206.668319                |
| Sum of electronic and thermal Enthalpies=    | -1206.667374                |
| Sum of electronic and thermal Free Energies= | -1206.744072                |

CPCM (THF) M06/def2TZVP E = -2544.45197474

**TS-βF-elim-(dmbpy)Ni(Ph)(SCF<sub>3</sub>)**

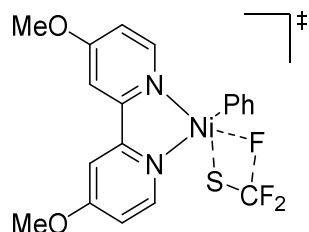

|                                              |                             |
|----------------------------------------------|-----------------------------|
| Zero-point correction=                       | 0.336813 (Hartree/Particle) |
| Thermal correction to Energy=                | 0.362610                    |
| Thermal correction to Enthalpy=              | 0.363554                    |
| Thermal correction to Gibbs Free Energy=     | 0.278627                    |
| Sum of electronic and zero-point Energies=   | -1862.098271                |
| Sum of electronic and thermal Energies=      | -1862.072474                |
| Sum of electronic and thermal Enthalpies=    | -1862.071529                |
| Sum of electronic and thermal Free Energies= | -1862.156457                |

CPCM (THF) M06/def2TZVP E = -3199.95069403

**(dmbpy)Ni(Ph)(F)**

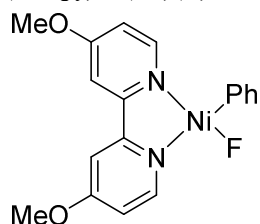

|                                              |                             |
|----------------------------------------------|-----------------------------|
| Zero-point correction=                       | 0.323499 (Hartree/Particle) |
| Thermal correction to Energy=                | 0.345305                    |
| Thermal correction to Enthalpy=              | 0.346249                    |
| Thermal correction to Gibbs Free Energy=     | 0.270156                    |
| Sum of electronic and zero-point Energies=   | -1226.242231                |
| Sum of electronic and thermal Energies=      | -1226.220425                |
| Sum of electronic and thermal Enthalpies=    | -1226.219481                |
| Sum of electronic and thermal Free Energies= | -1226.295573                |

CPCM (THF) M06/def2TZVP E = -2563.98163656

**(dmbpy)Ni(SCF<sub>3</sub>)**

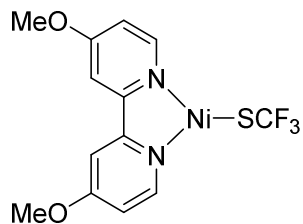

|                                              |                             |
|----------------------------------------------|-----------------------------|
| Zero-point correction=                       | 0.245467 (Hartree/Particle) |
| Thermal correction to Energy=                | 0.266804                    |
| Thermal correction to Enthalpy=              | 0.267748                    |
| Thermal correction to Gibbs Free Energy=     | 0.190353                    |
| Sum of electronic and zero-point Energies=   | -1630.677349                |
| Sum of electronic and thermal Energies=      | -1630.656012                |
| Sum of electronic and thermal Enthalpies=    | -1630.655068                |
| Sum of electronic and thermal Free Energies= | -1630.732463                |
| CPCM (THF) M06/def2TZVP E = -2968.46411812   |                             |

**TS-βF-elim-(dmbpy)Ni(SCF<sub>3</sub>)**

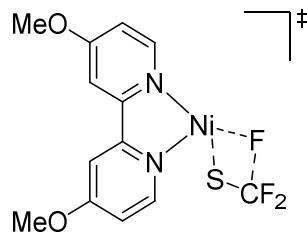

|                                              |                             |
|----------------------------------------------|-----------------------------|
| Zero-point correction=                       | 0.242945 (Hartree/Particle) |
| Thermal correction to Energy=                | 0.264596                    |
| Thermal correction to Enthalpy=              | 0.265540                    |
| Thermal correction to Gibbs Free Energy=     | 0.186795                    |
| Sum of electronic and zero-point Energies=   | -1630.639163                |
| Sum of electronic and thermal Energies=      | -1630.617512                |
| Sum of electronic and thermal Enthalpies=    | -1630.616568                |
| Sum of electronic and thermal Free Energies= | -1630.695314                |
| CPCM (THF) M06/def2TZVP E = -2968.42300663   |                             |

**TS-OA-PhI-(dmbpy)Ni(SCF<sub>3</sub>)**

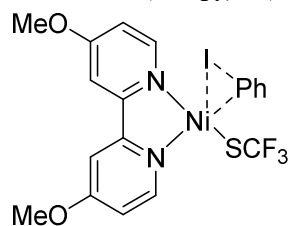

|                                              |                             |
|----------------------------------------------|-----------------------------|
| Zero-point correction=                       | 0.336942 (Hartree/Particle) |
| Thermal correction to Energy=                | 0.365276                    |
| Thermal correction to Enthalpy=              | 0.366220                    |
| Thermal correction to Gibbs Free Energy=     | 0.272716                    |
| Sum of electronic and zero-point Energies=   | -1873.572800                |
| Sum of electronic and thermal Energies=      | -1873.544466                |
| Sum of electronic and thermal Enthalpies=    | -1873.543522                |
| Sum of electronic and thermal Free Energies= | -1873.637026                |
| CPCM (THF) M06/def2TZVP E = -3497.77267139   |                             |

**(dmbpy)Ni(I)(SCF<sub>3</sub>)(Ph)**

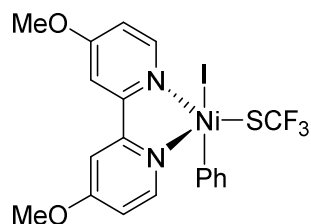

|                                              |                             |
|----------------------------------------------|-----------------------------|
| Zero-point correction=                       | 0.338628 (Hartree/Particle) |
| Thermal correction to Energy=                | 0.367167                    |
| Thermal correction to Enthalpy=              | 0.368111                    |
| Thermal correction to Gibbs Free Energy=     | 0.274753                    |
| Sum of electronic and zero-point Energies=   | -1873.590197                |
| Sum of electronic and thermal Energies=      | -1873.561658                |
| Sum of electronic and thermal Enthalpies=    | -1873.560714                |
| Sum of electronic and thermal Free Energies= | -1873.654072                |

CPCM (THF) M06/def2TZVP E = -3497.78070392

**TS-RE-(dmbpy)Ni(I)(Ph-SCF<sub>3</sub>)**

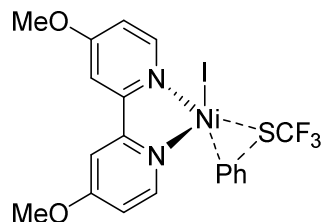

|                                              |                             |
|----------------------------------------------|-----------------------------|
| Zero-point correction=                       | 0.338029 (Hartree/Particle) |
| Thermal correction to Energy=                | 0.366007                    |
| Thermal correction to Enthalpy=              | 0.366951                    |
| Thermal correction to Gibbs Free Energy=     | 0.275230                    |
| Sum of electronic and zero-point Energies=   | -1873.582866                |
| Sum of electronic and thermal Energies=      | -1873.554889                |
| Sum of electronic and thermal Enthalpies=    | -1873.553945                |
| Sum of electronic and thermal Free Energies= | -1873.645665                |

CPCM (THF) M06/def2TZVP E = -3497.77016884

**(dmbpy)Ni(I)**

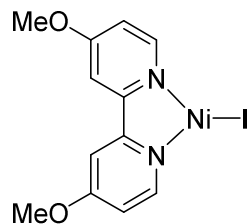

|                                              |                             |
|----------------------------------------------|-----------------------------|
| Zero-point correction=                       | 0.228570 (Hartree/Particle) |
| Thermal correction to Energy=                | 0.244779                    |
| Thermal correction to Enthalpy=              | 0.245723                    |
| Thermal correction to Gibbs Free Energy=     | 0.180999                    |
| Sum of electronic and zero-point Energies=   | -906.436669                 |
| Sum of electronic and thermal Energies=      | -906.420460                 |
| Sum of electronic and thermal Enthalpies=    | -906.419516                 |
| Sum of electronic and thermal Free Energies= | -906.484240                 |

CPCM (THF) M06/def2TZVP E = -2530.39541558

## 5. NMR spectra

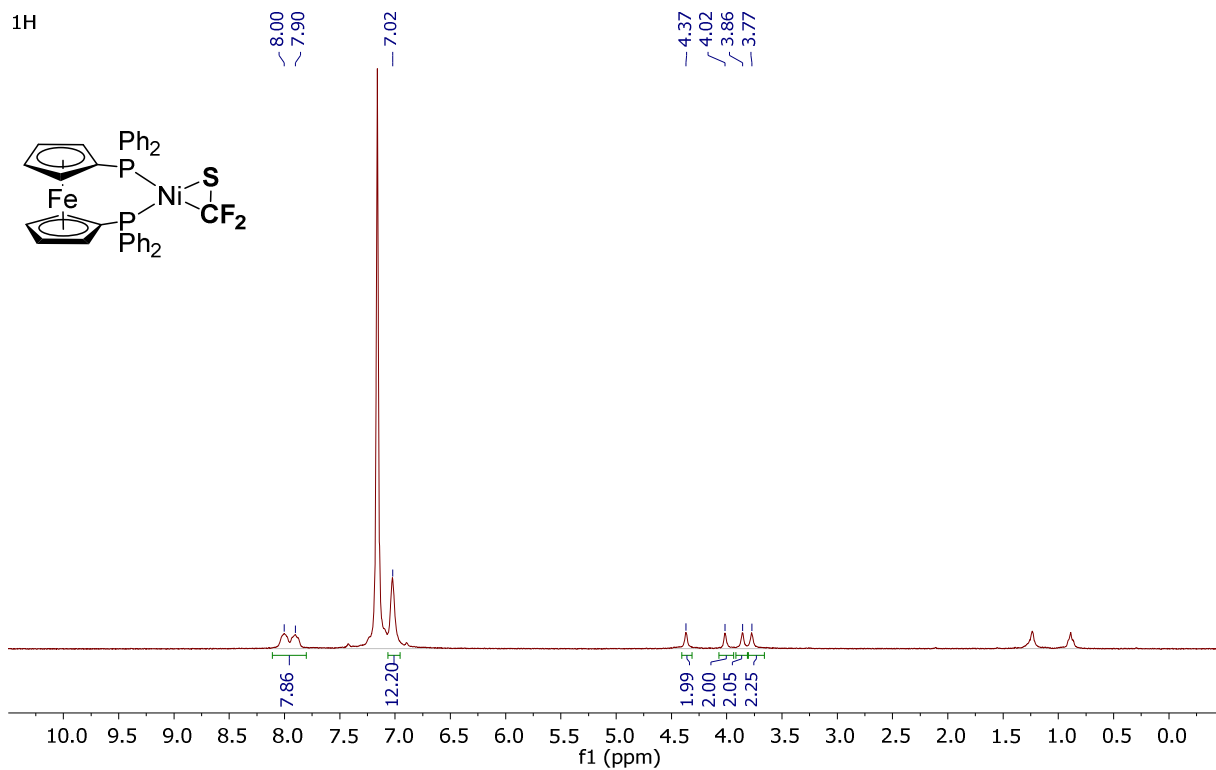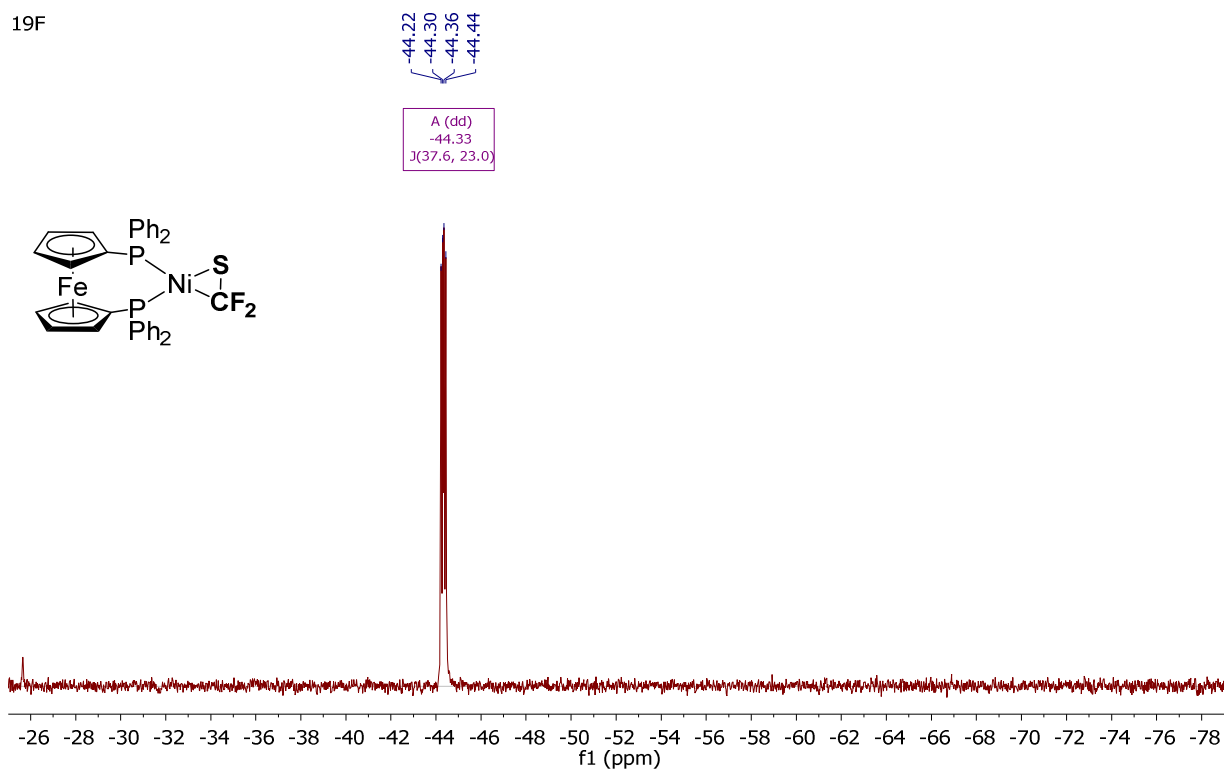



31P

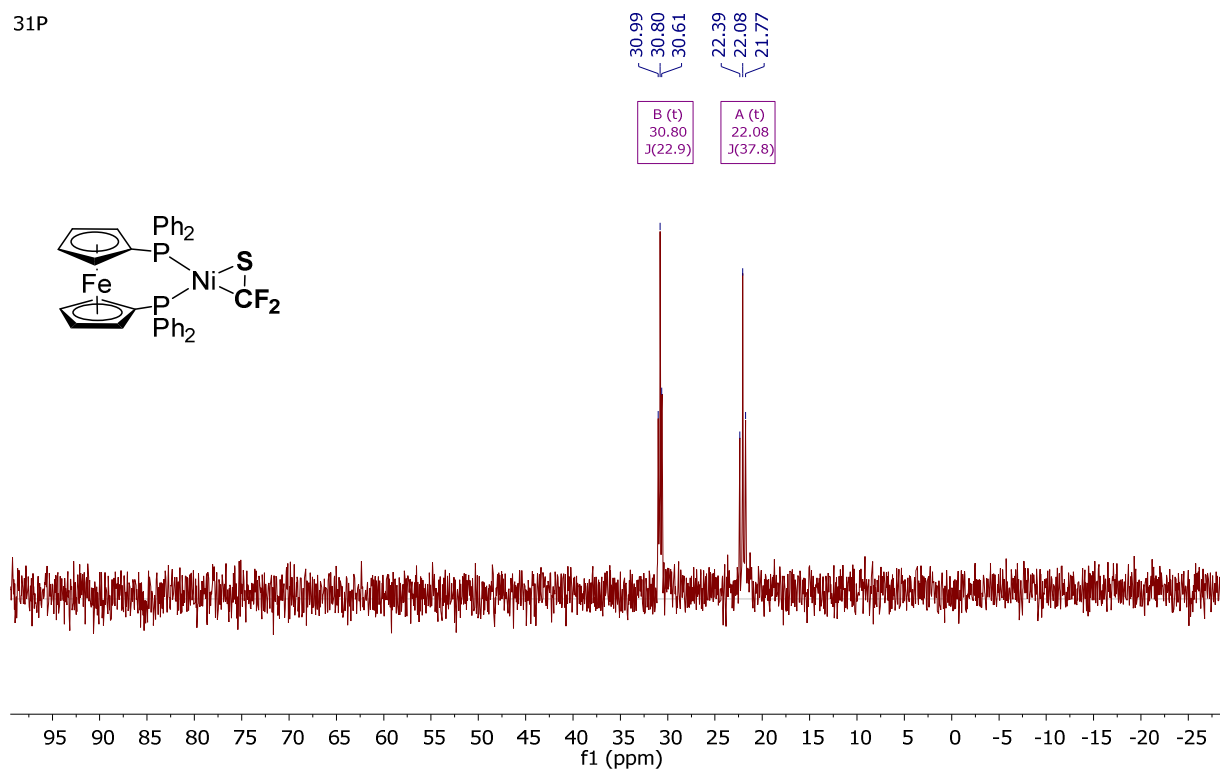

<sup>1</sup>H

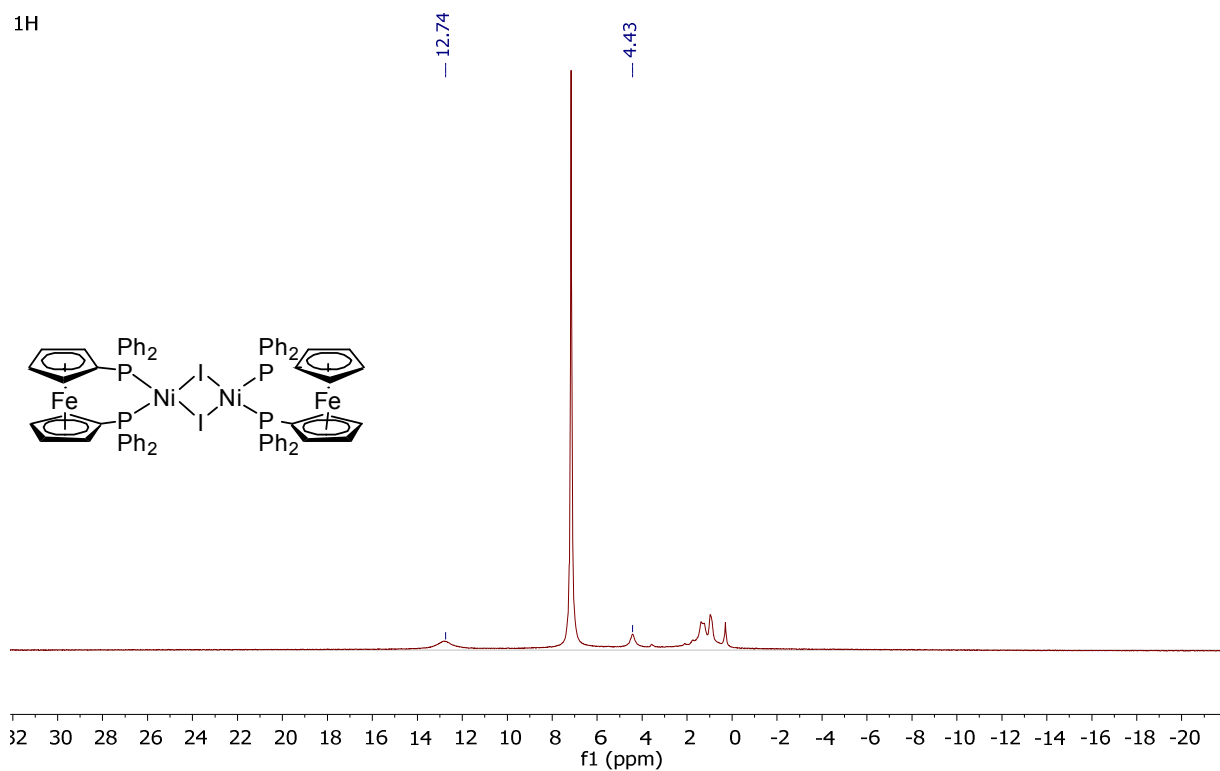

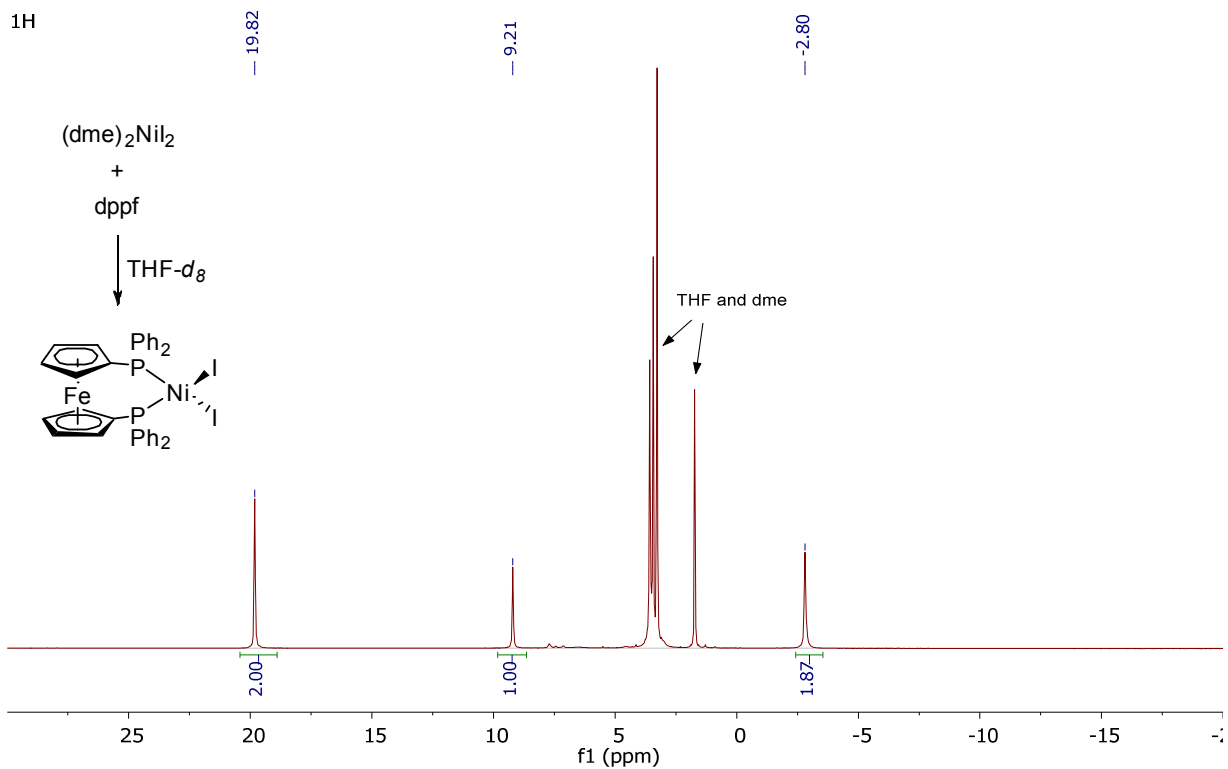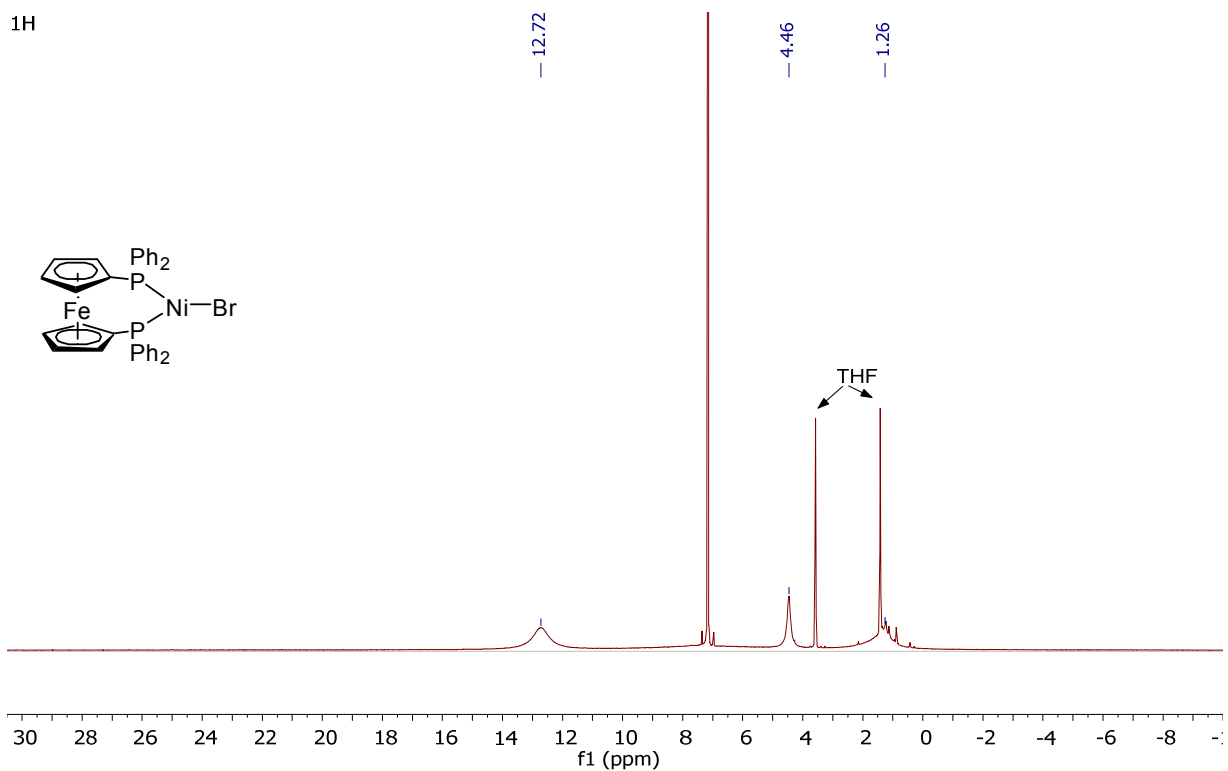

## 6. References

- (1) Yin, G.; Kalvet, I.; Schoenebeck, F. *Angew. Chem. Int. Ed.* **2015**, *54*, 6809-6813.
- (2) Yin, G.; Kalvet, I.; Englert, U.; Schoenebeck, F. *J. Am. Chem. Soc.* **2015**, *137*, 4164-4172.
- (3) Crochet, A.; Fromm, Katharina M. *Z. Anorg. Allg. Chem.* **2010**, *636*, 1484-1496.
- (4) Gaussian 09, Revision D.01, Frisch, M. J.; Trucks, G. W.; Schlegel, H. B.; Scuseria, G. E.; Robb, M. A.; Cheeseman, J. R.; Scalmani, G.; Barone, V.; Mennucci, B.; Petersson, G. A.; Nakatsuji, H.; Caricato, M.; Li, X.; Hratchian, H. P.; Izmaylov, A. F.; Bloino, J.; Zheng, G.; Sonnenberg, J. L.; Hada, M.; Ehara, M.; Toyota, K.; Fukuda, R.; Hasegawa, J.; Ishida, M.; Nakajima, T.; Honda, Y.; Kitao, O.; Nakai, H.; Vreven, T.; Montgomery, J. A., Jr.; Peralta, J. E.; Ogliaro, F.; Bearpark, M.; Heyd, J. J.; Brothers, E.; Kudin, K. N.; Staroverov, V. N.; Kobayashi, R.; Normand, J.; Raghavachari, K.; Rendell, A.; Burant, J. C.; Iyengar, S. S.; Tomasi, J.; Cossi, M.; Rega, N.; Millam, J. M.; Klene, M.; Knox, J. E.; Cross, J. B.; Bakken, V.; Adamo, C.; Jaramillo, J.; Gomperts, R.; Stratmann, R. E.; Yazyev, O.; Austin, A. J.; Cammi, R.; Pomelli, C.; Ochterski, J. W.; Martin, R. L.; Morokuma, K.; Zakrzewski, V. G.; Voth, G. A.; Salvador, P.; Dannenberg, J. J.; Dapprich, S.; Daniels, A. D.; Farkas, Ö.; Foresman, J. B.; Ortiz, J. V.; Cioslowski, J.; Fox, D. J. Gaussian, Inc., Wallingford CT, 2009.
- (5) C. J. Cramer, *Essentials of Computational Chemistry: Theories and Models*; 2nd ed.; Wiley: New York, USA, 2004.
